# Supplementary material
Source: publisher figshare collection journal article supplement (https://geolsoc.figshare.com/ndownloader/files/17992241)
Supplement: Supplementary file 1 [file 17992241]

Table S2.  Carbon and oxygen isotope composition of belemnite rostra from the Bathonian, Tithonian, Aptian, Turonian, Campanian and Maastrichtian of the Saratov-Samsra area. D – diameter of the rostrum.
Sample
	Rostrum	Species (locality, zone)	Location
(D, mm)	Diagenetic alteration	ä13C 
(V-PDB)()	ä18O (V-PDB) ()	ToC	
				Original calcite (%)	Admixture
(á-SiO2)	Colour				
776-1	776	Paramegateuthis bella
 (Barskov) (Sokur, lower Bathonian,  ?ishmae Zone)	D =14.0	100	No	Colourless	0.9	-3.8	28.7	
778-1	778	Pachyteuthis optima
Sachs et Nalnjaeva
(Sokur, lower Bathonian,  ?ishmae Zone)	D = 15.1	100	No	Colourless	0.8	-3.2	25.8	
10-2/228-7
	Sample 10-2/228 (two belemnite rostra  and
One bivalve 
Shell)	Undetermine belemnite
rostrum (Agrofenovka,
lower Aptian,
?tenuicostatus Zone)	2 	100	
No	Colourless	2.2	-2.7	23.6	
10-2/228-8
	Same sample	Undetermine belemnite
rostrum (Agrofenovka,
lower Aptian,
?tenuicostatus Zone)	2.5	100	
No	Colourless	2.0	-2.7	23.6	
10-2/244-1	10-2/244	Oxyteuthis? sp. (Agrofenovka,
lower Aptian,
?tenuicostatus Zone	12.0	100	No	Colourless Colourless	1.7	-1.3	17.1	
17-1/337-1	17-1/337	Acroteuthhis ? sp. (Maryevka-1, upper
Volgian, nodiger Zone)	6.0	-	-		Colourless	-0.4	-1.5	18.0	
17-1/361-1	17-1/361	Acroteuthhis ? sp. (Maryevka-1, upper
Volgian, nodiger Zone)	18.0	100	-		Colourless	0.3	-2.0	20.1	
15-2/368-1	15-2/368-115-2/368-1	Undetermined belemnite
rostrum (Maryevka-1, 
upper Volgian)	13.0	100	 á-SiO2
(traces)	Cream	-1.8	-1.9	19.6	
15-2/368-2	Samr rostrum	Same	12.6	100	No	Colourless	-0.1	-0.6	14.3	
15-4/384-1	15-4/384	Undetermined belemnite
rostrum (Maryevka-1, 
upper Volgian, fulgens Zone) 	11.0	100	No	Colourless	-0.1	-1.4	17.5	
15-2/404-1	15-2/404	Undetermined belemnite
rostrum (Maryevka-1, 
upper Volgian, nkitini Zone) 	8.6	-	-	Colourless	0.8	-1.3	17.1	
15-2/408-1	15-2/408	Undetermined belemnite
rostrum (Maryevka-1, 
upper Volgian, nikitini Zone)	13.0	100	No	Colourless	-1.9	
-2.7	23.6	
15-5/414-1	15-5/414	Undetermined belemnite
rostrum (Maryevka-1, 
upper Volgian, fulgens Zone) 	8.9	100	No	Colourless	1.9	-1.2	16.7	
15-5/420-1	15-5/420	Undetermined belemnite
rostrum (Maryevka-1, 
upper Volgian, fulgens Zone)	8.9	100	á-SiO2
(traces)	Colourless	-0.1	-1.6	18.4	
12-1/522-1	12-1/522	Undetermined belemnite
rostrum (Forpos Mount, 
upper Turonian)	
5.0	-	-	Colourless	1.4	-0.8	15.1	
314-2/460-15(1)	Sample
14-2/460
(two belemniterostra and many bivalve shells)	Undetermined belemnite
rostrum (Kashpir, 
middle Volgian, nikitini Zone)	6.0	-	-	Colourless	-0.5	-1.9	19.6	
314-2/460-15-1	Same sample	Undetermined belemnite
Rostrum (Kashpir, 
middle Volgian, nikitini Zone)	6.0	100	á-SiO2
(traces)	Colourless	-0.5	-1.9	19.6	
314-2/460-15-2	Same sample	Same	5.5	-	-	Colourless	-0.6	-2.3	21.4	
314-2/460-15-3	Same sample	Same	5.0	-	-	Colourless	-0.4	-2.7	21.8	
314-2/460-15-4	Same sample		4.5	-	-	Colourless	-0.1	-2.1	20.9	
314-2/460-15-5	Same sample		4.0	-	-	Colourless	
0.2	-2.1	20.9	
314-2/460-15-6	Same sample 		3.0	-	-	Colourless	0.2	-2.1	20.9	
4-2/562-1	4-2/562	Belemnitella? sp. (Semenovskij area, uppermost Maastrichtian,
5 m below its top)	16.5	-	-	Colourless 	2.2	0.8	9.1	
5-2/566-1	5-2/566	Belemnitella mucronata
Scloth. (Krasnyj Oktyabr, lower Campanian (upper part, Phosphorite Horizon))	13	100	No	Colourless	2.1	0.5	10.2	
5-6/568-1	5-6/568	Belemnitella sp. (Krasnyj Oktyabr, uppermost Campanian or lowermost Maastrichtian)
	17.0	-	-	Colourless	1.6	1.9	8.4	
5-8/572-1	5-8/572	Belemnitella sp. (Krasnyj Oktyabr, lower  Maastrichtian, strichus Zone)
	14.0	-	-	Colourless 	0.7	1.3	7.4	
9-3/588-1	9-3/588	Belemnitella? sp. (Khvalynsk quarry, lower Maastrichtian)
	13.5	100	No	Colourless	0.8	0.8	9.1	
9-5/592-1	9-5/592	Belemnitella?  sp. (Khvalynsk quarry, lower Maastrichtian)
	10.0	-	-		1.1	0.58	10.2	
